# Supplementary material for: Identification of Novel Genome-Wide Associations for Oral Inflammatory Traits
Source: Research Square preprint supplement (doi:10.21203/rs.3.rs-104530/v1), 2020-11-13

**Fig. S4 The heritability estimation for each oral inflammatory trait based on their original UKBB GWAS summary statistics and MTAG-analysis.**

The y-axis indicates heritability, and the x-axis shows the phenotype.


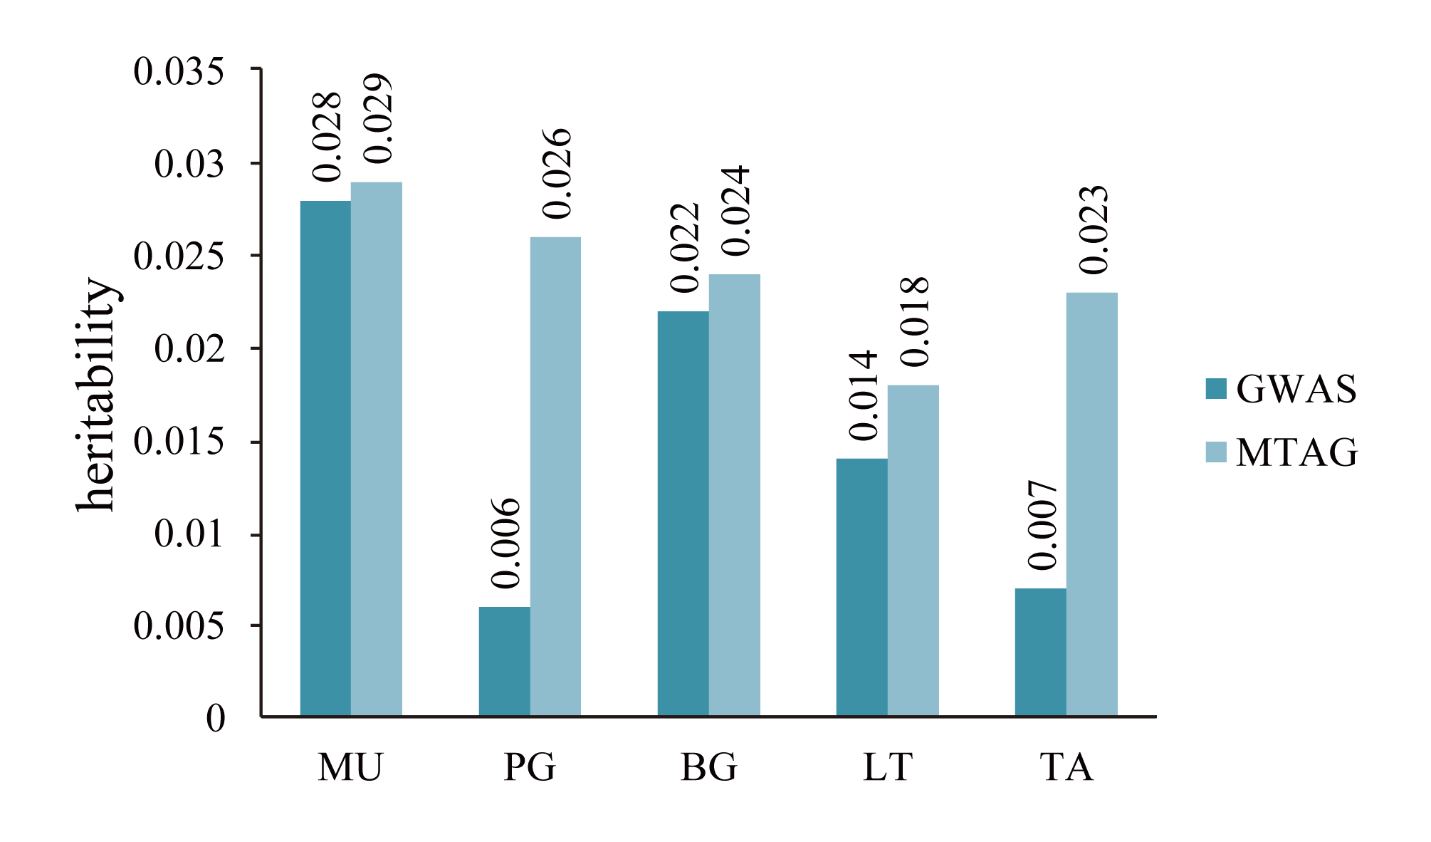

Supplement: Supplementary file 1 [file 73f191d37ef8e9c7f26fd66c.docx]
