# Supplementary material for: Identification of Novel Genome-Wide Associations for Oral Inflammatory Traits
Source: Research Square preprint supplement (doi:10.21203/rs.3.rs-104530/v1), 2020-11-13
Supplement: Supplementary file 4 [file b2c54abe66688f0c7d25199c.xlsx]

## Sheet: Data
Data File S2: Genome-wide significant pleiotropic loci from MTAG-analysis
index_snp	phenotype	chr	bpos	A1	A2	freq	beta	se	pval	closest_gene
rs1518110	PG	1	206944861	C	A	0.800662	-0.0109312	0.00142577	1.76e-14	IL10
	TA						-0.0128772	0.00191508	1.77e-11
rs4683205	MU	3	46334670	A	G	0.534451	-0.0357744	0.00237687	3.4e-51	CCR3
	PG						-0.00986276	0.00114191	5.77e-18
	TA						-0.0119934	0.0015338	5.31e-15
rs17753641	MU	3	159647674	G	A	0.118818	0.0992607	0.00366411	1.29e-161	IL12A-AS1
	PG						0.0258979	0.00176033	5.4e-49
	TA						0.0313482	0.00236446	4.05e-40

## Sheet: Note
phenotype: abbreviation of corresponding oral inflammatory traits
chr: chromosome
index_snp: the lead SNP at each locus
bpos: position (hg19)
A1: the effect allele
A2: the reference allele
freq: the frequency of A1
beta: estimate of effect with respect to A1
se: standard error of beta
pval: association P values from MTAG of the index snp
