# Supplementary material for: Identification of Novel Genome-Wide Associations for Oral Inflammatory Traits
Source: Research Square preprint supplement (doi:10.21203/rs.3.rs-104530/v1), 2020-11-13
Supplement: Supplementary file 5 [file c0878f4aba83643e33aa2a06.xlsx]

## Sheet: Data
Data File S4: Credible sets of the novel MTAG GWS loci.
phenotype	index_snp	snp_in_credible_set	chr	pos	ref	alt	frq	beta	se	pval	R2	PP
PG	rs1518110	rs1518110	1	206944861	C	A	0.800662	-0.0109312	0.00142577	1.7628e-14	1	0.237157
		rs1518111	1	206944645	C	T	0.800559	-0.010906	0.00142549	1.99943e-14	1	0.209532
		rs1554286	1	206944233	G	A	0.827418	-0.0114748	0.00150734	2.68524e-14	0.7946	0.15681
		rs3024490	1	206945311	C	A	0.778335	-0.0104284	0.00137132	2.8565e-14	0.8936	0.147577
		rs1800871	1	206946634	G	A	0.778173	-0.0104117	0.00137096	3.08966e-14	0.8936	0.136588
		rs1800872	1	206946407	G	T	0.778156	-0.010376	0.00137092	3.77254e-14	0.8936	0.11226
	rs17753641	rs1461102	3	159506639	C	T	0.802042	-0.013189	0.0014295	2.80097e-20	0.4316	1
		rs17753641	3	159647674	G	A	0.118818	0.0258979	0.00176033	5.40479e-49	1	1
TA	rs1518110	rs1518110	1	206944861	C	A	0.800662	-0.0128772	0.00191508	1.76684e-11	1	0.195421
		rs1518111	1	206944645	C	T	0.800559	-0.0128676	0.00191471	1.81255e-11	0.9942	0.1906
		rs3024490	1	206945311	C	A	0.778335	-0.01234	0.00184194	2.09211e-11	0.8936	0.165655
		rs1554286	1	206944233	G	A	0.827418	-0.0135541	0.00202464	2.16283e-11	0.7946	0.160356
		rs1800871	1	206946634	G	A	0.778173	-0.0123238	0.00184146	2.19532e-11	0.8936	0.158035
		rs1800872	1	206946407	G	T	0.778156	-0.012269	0.00184141	2.68587e-11	0.8936	0.129753

## Sheet: Note
phenotype: abbreviation of corresponding oral inflammatory traits
index_snp: the lead SNP at each novel independent locus
chr: chromosome
pos: position(hg19)
A1: the effect allele
A2: the non-effect allele
frq: the frequency of A1
beta: the estimated effect size of A1
se: the standard error of beta
pval: P-value of potential causal snp
R2: the linkage disequilibrium between index_snp and potential causal snps in a credible set
PP: posterior probabilities for each SNP in the credible set
